# Supplementary material
Source: publisher figshare collection journal article supplement (https://acs.figshare.com/ndownloader/files/18058046)
Supplement: Supplementary file 1 [file 18058046]

## Supporting Information

### Design of spherical crystallization for drugs based on thermal-induced liquid-liquid phase separation: case studies of water-insoluble drugs

Mengmeng Sun<sup>1, 2</sup>; Shichao Du<sup>1, 2</sup>; Weiwei Tang<sup>1, 2</sup>; Lina Jia<sup>1, 2</sup>; Junbo Gong<sup>1, 2\*</sup>

1 School of Chemical Engineering, State Key Laboratory of Chemical Engineering, Tianjin University, Tianjin, 300072, China;

2 The Co-Innovation Center of Chemistry and Chemical Engineering of Tianjin, Key Laboratory Modern Drug Delivery and High Efficiency in Tianjin, Tianjin, 300072, China;

Comparison of the solid-liquid equilibrium (SLE) data and liquid-liquid equilibrium (LLE) data of the Ibuprofen/water with the data in literature<sup>1</sup>:

Table S1. Comparison of the experimental SLE and LLE data in this work with the data reported in the literature <sup>a</sup>.

| SLE data ( $w_{RS}$ ) |                       |            | SLE data ( $w_{RS}$ ) in literature |                                     |             |
|-----------------------|-----------------------|------------|-------------------------------------|-------------------------------------|-------------|
| 40°C                  | $5.18 \times 10^{-5}$ |            | 40°C                                | $(5.95 \sim 6.41) \times 10^{-5}$   |             |
| 50°C                  | $6.24 \times 10^{-5}$ |            | 52°C                                | $(11.28 \sim 13.32) \times 10^{-5}$ |             |
| 60°C                  | $7.20 \times 10^{-5}$ |            | 62°C                                | $(17.45 \sim 20.41) \times 10^{-5}$ |             |
| LLE data              | $w_{RS}^1$            | $w_{RS}^2$ | LLE data in literature              | $w_{RS}^1$                          | $w_{RS}^2$  |
| 80°C                  | $2.31 \times 10^{-4}$ | 0.976      | 75°C                                | $(3.68 \sim 3.86) \times 10^{-4}$   | 0.98~0.9806 |
| 85°C                  | $7.22 \times 10^{-4}$ | 0.938      | 82°C                                | $(4.22 \sim 4.68) \times 10^{-4}$   | 0.974~0.976 |

a.  $w_{RS}$  is the mass fraction of the racemic mixture of ibuprofen in the ibuprofen/water system;  $w_{RS}^1$  is the mass fraction of ibuprofen in the solvent-rich phase and  $w_{RS}^2$ , in the solute-rich phase.

It can be seen from the **Table S1** that relatively large deviation exists in the two sets of SLE data. It may result from the difference between HPLC device and the HPLC method. In addition, the difference between the raw materials of the RS-ibuprofen and the exceedingly low solubility of ibuprofen in water may also have an effect on the determined values and the deviation.

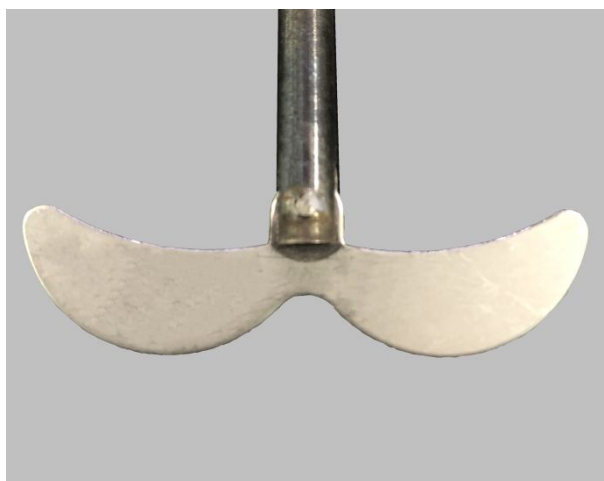

Figure S1. Geometry of the stirrer used in the experiments.

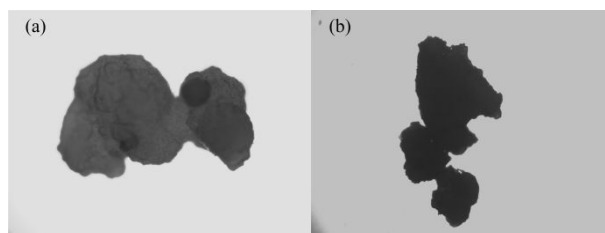

Figure S2. Secondary agglomerates of the (a) L-menthol and (b) Ibuprofen without the use of SDS.

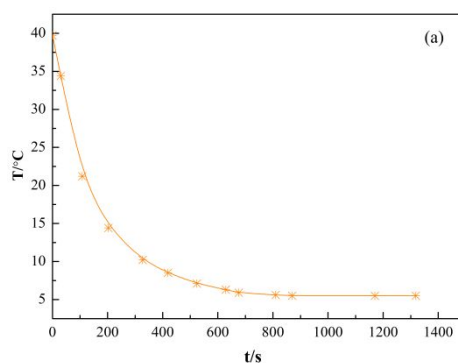

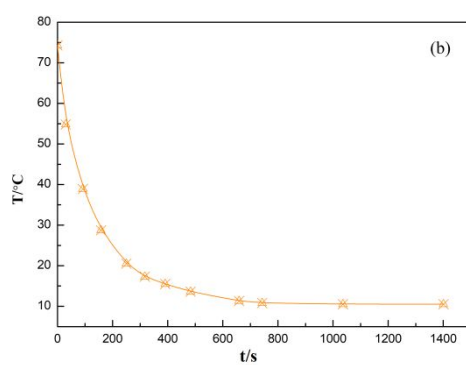

Figure S3. Temperature history of the spherical crystallization process: (a). L-menthol; (b). Ibuprofen

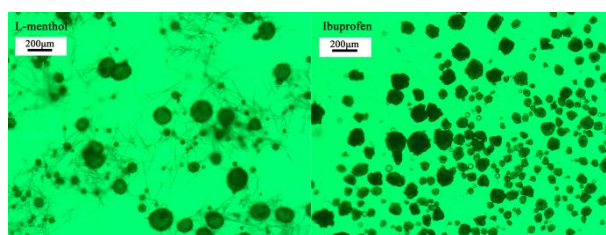

Figure S4. The products of L-menthol and ibuprofen when adding the SDS right starting the process

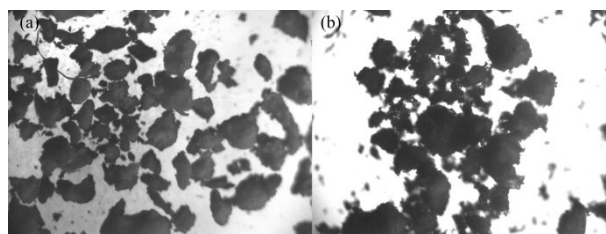

Figure S5. The products of (a) L-menthol and (b) ibuprofen under the condition of LLPS in the mixture of ethanol/water.

## REFERENCE

- (1) Codan L.; Casillo S.; Babler M. U.; Mazzotti M., Phase Diagram of a Chiral Substance Exhibiting Oiling Out. 2. Racemic Compound Forming Ibuprofen in Water, *Crystal Growth Design*, **2012**, 12, 5298–5310.
